# Supplementary material for: Integrative CRISPR Activation and Small Molecule Inhibitor Screening for lncRNA Mediating BRAF Inhibitor Resistance in Melanoma
Source: MDPI journal article supplement (doi:10.3390/biomedicines11072054), 2023-07-21
Supplement: s1 [file s1]

>XLOC\_067371|chr6:158650472-158653116

CAGCACTGTGAGGGAGATATTGTTTTTTGAATGTATGGCTAAAGACACAGCATTTGGAATATTGTTCTTG  
TTTGTCACTTGTTAGTAAGTGGTAGAACAGGACTTCAGTGAAGATATTTGCTCCAAAGACATTCGCAAA  
ACCACTGACACTGTGCAAAATGACACAGGCAGAAAACAACTTGAGGGACTTCTCAGTTTTGCTGAGAG  
TTGGGTGTATTTGTACCCAAGAGTGCTGGATAAGAGAGAGTTTATACCTGTGGGCCTTATGGAAAATA  
TGGTATTATTAGAAGAGTAGTTTCAAGGTTTGTATTTTTTTTTTTCATTTTGCAGAAGCAAGAACACCTGTA  
TCATTCAGTCTTGATGGTATTTGTTGTATCATTTTTATACTGTTACATAGATTGTATTTATTAAGTCAAGAA  
AGTTCATCTTTAATCCTTCTTCTCTTTAGTCTGACAGCAAGGGTCAAATTTCCATAATTTGCTCCAGGCCA  
GGGCCAAGCAAATGAATGCTGATCCCTGATCCGTGTGTGTGTGCGCGCGCGCAAGAGAGAAAAGGGT  
TTAAAAAATGTTATGTATATATTTTGGCCAGGAGTGGTGACTCATGCCTGTAATTCAGCACTTTGGGAG  
GCCGAGGTGGGCAGATAACCTGAGGTCAGGAGTTTGAGACCAGCCTGGCCAACATGGTGAAACCTCGT  
ATCTATTAATAAATACAAAATTAGATGGGCATGGTGGTAGCGCCTGTAATCCCAGCAATCCCAGCTACTCG  
GGAGGCTGAGGCAGGAGAATTGCTTGAACCTGGGAGGCGGAGGTTGCAGTTAGCGGAGATCACACCA  
CTGCACCCCAGCCTGGGCAACAGAGTGAGACTCCGTCTCAAAAAAACAACAAAAAAGTTATGCACACA  
TTTTAAAGTAATTCTGTACAGAAATTGTAAATTTTGAAGGCAAGGGCCATATCATATTCTTCCTTTGATCT  
CTCCACAGTATTTAACATAACATTGAGCACTAACTGAAGTGCAATACTAATTACATTGAGCGAAGATTA  
TCTTTTAAAGTACTCTAAGATGTAAATGTAGTTTTATTTCTTAAGGTTTTCAAATTAAGTTTTGGAGTGC  
TTATAAAATATAATCAAATAATGCTGATCTTAATGCTTCTATTAAATGCGTTATACATATATATTATATATA  
TACTCTTTTTGAGACAGGGTCTCACTCTGTCACCCAGGCTGGAGTGCAGTGGCGCAATCTCGGCTCCCTG  
CAACCTCTGCCTCTCGGGGTTCAAAGGATTCTCGTGCCTCAGCCTCCGGAGTAGCTGGGACCACAGTTAA  
ATGCATTATATTTATACGCATTCAAACATGAGGCAACTATTCTTGGTTCAGTTACTTTTAAATTAATATTTA  
ATTTTCTTGTGTTAGAGCCGGGTTTCGCTATGCTCAGGCTGGAGTCCACAGGCATGATTATAGCTCACTG  
CGGCCCCCAGCTCCTGGTCTCCAGGGATCCACCCGCCTCAGCCTCCGGAGTAGCTGGGGACTACACGCC  
ACGCTTGCTTACCTTTTTTAAAAATAAAAAAAGTCTAGGTAGCATTGTCAAATTTGTAAAATTAGGTC  
AAGTGTGGTGGCTCATGCCTGTAATCTCAACACTTTGGAAGGCAGAGGCAGGAGGATCACTTGGAGCC  
AGGAGTTCGAGATGAGCCAGGGCAACAGAGCGAACTCCTACACTGAAAAAAAAAAAAATCACAAATGA  
GCTGGGCATGGTGGCGGGCACCTGTAGTCCCTAGCTACTCGGGAGGCTGAGGCGAGTATTCATGGAAT  
TTCAGAATTTAACAACCTCGGTCCAATTTTTTTTTTGACAAAATTCACAGAATCAGTAATTCTTAAGTCTG  
AAACGGATTTCGAAAACTTTTGCAGACAGGCAAAACAGAAAACAACGCTGAGCCCTTGCGGAAGAGTCG  
CTGCTATTCCTAACTATATGGGGCCTCTAATGCTTCAAATCAAGGAAAAAAGAATGCTTTTTTTTTTAAAC  
TACACGTGTGAAGAGTCACACAATCAGCTATGCTATTTCTTTGCACAAGCTGGAAAAAGAAGAGATTAT  
CAAGTTTCGTTGTTAGCAGGACATCCATCAAATTTAACAGGAGGGGGAAGGCTGTGAATTGTTCTTCCCT  
GAGTTAAATGACGCTATCCGGTCTTTCTCCATGGACAACCTGAAGAAGAGATCCTCTGGGATGTTACCA  
TCGCGGCCACTCGGGTGACCGTTTTCCCGGGGAGCTGCGCGGGTCGGTGGTGACAGCGCTTCTGTGCTC  
CCGGCGGCTTTCCCTGTAAGACATAATGGGACTGGGACGTCCACTTCCGGCTCAAACGAAGTTCAGACG  
GCGCGCAAGCCGCGCGGTGCCCCGGGTGCTGAGGCCGTCCCAGGCCAGGAGACTGGAGGCCTAGGCCC  
GGCACTGTGGGCATCTTGGGCACCGTGCGCGGTGCGGGCCGGGGGCGGGGGTCTCCCGGGGTGGCG  
ACGCCGGGGGTGCGAGCAGGTGGCCCCGGGCAGGCGGGCGGCTCCGGTGGCGGGGCGGCGCGGGCCCC  
GCGGGGTGGCGTTGGGGACGCGAGCCCTGGGCCGGGGAGGGAGGGCGGCCGGGGGGCGCCAACGG  
CCGGCGGTG
